# Supplementary material for: Identification of autophagy‐related genes signature predicts chemotherapeutic and immunotherapeutic efficiency in bladder cancer (BLCA)
Source: PubMed Central journal article supplement (PMC8184684; doi:10.1111/jcmm.16552), 2021-05-07

**A**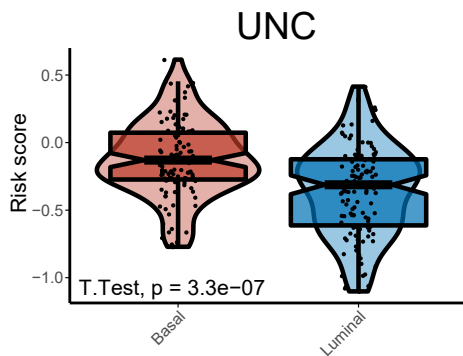**B**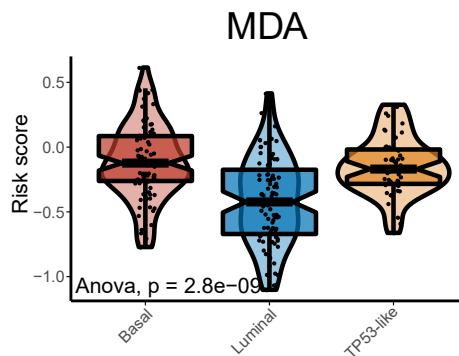**C**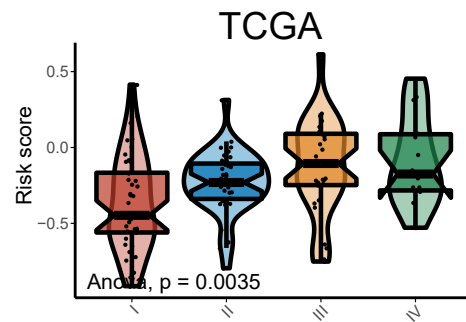**D**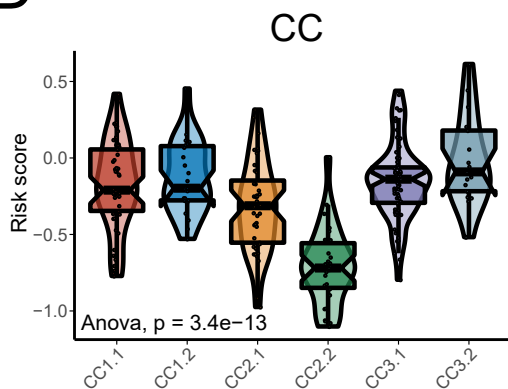**E**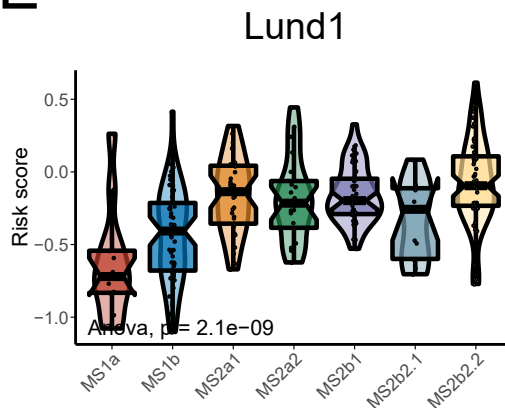**F**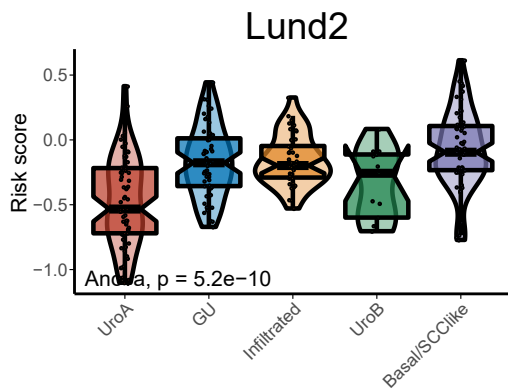**G**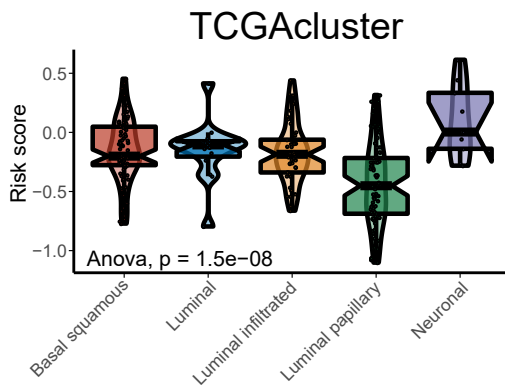

Supplement: JCMM-25-5417-s006.pdf [file JCMM-25-5417-s006.pdf]
