# Supplementary material for: Identification of autophagy‐related genes signature predicts chemotherapeutic and immunotherapeutic efficiency in bladder cancer (BLCA)
Source: PubMed Central journal article supplement (PMC8184684; doi:10.1111/jcmm.16552), 2021-05-07

Autophagy related signature

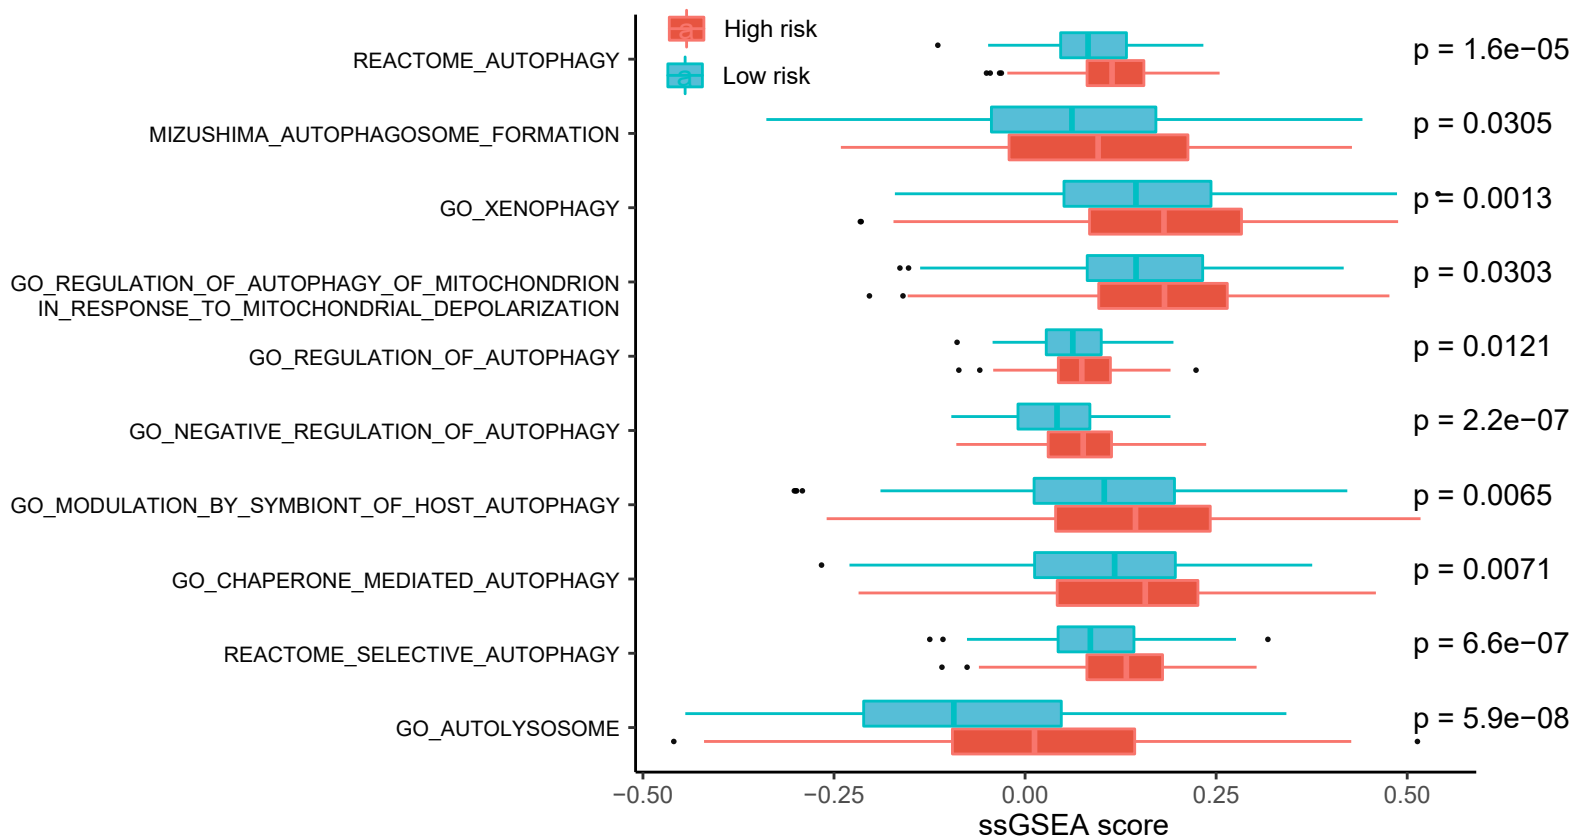

Supplement: JCMM-25-5417-s015.pdf [file JCMM-25-5417-s015.pdf]
