# Supplementary material for: Identification of autophagy‐related genes signature predicts chemotherapeutic and immunotherapeutic efficiency in bladder cancer (BLCA)
Source: PubMed Central journal article supplement (PMC8184684; doi:10.1111/jcmm.16552), 2021-05-07

**A**

Wang et al.  
Overall survival

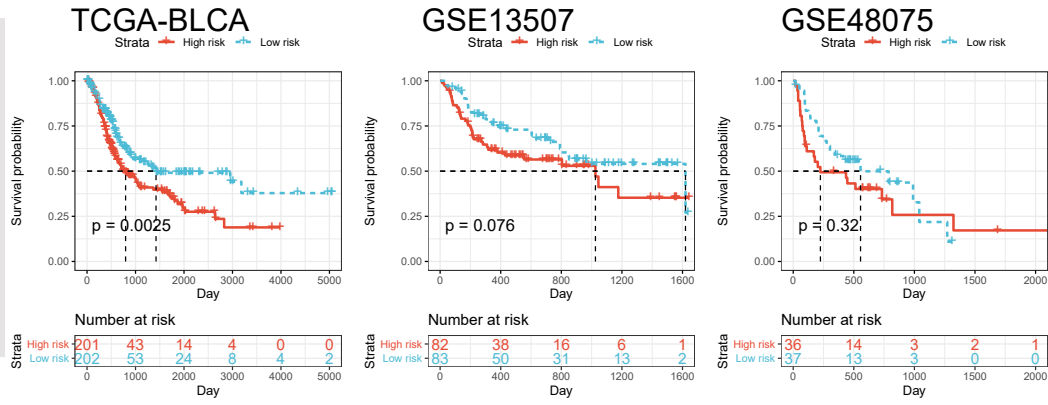

**B**

Wang et al.  
Disease free survival

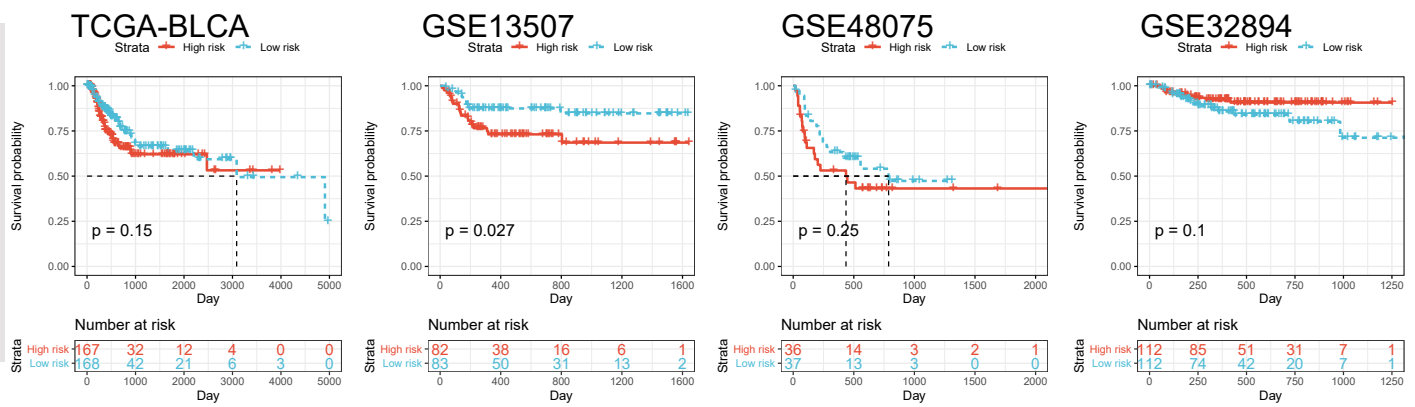

**C**

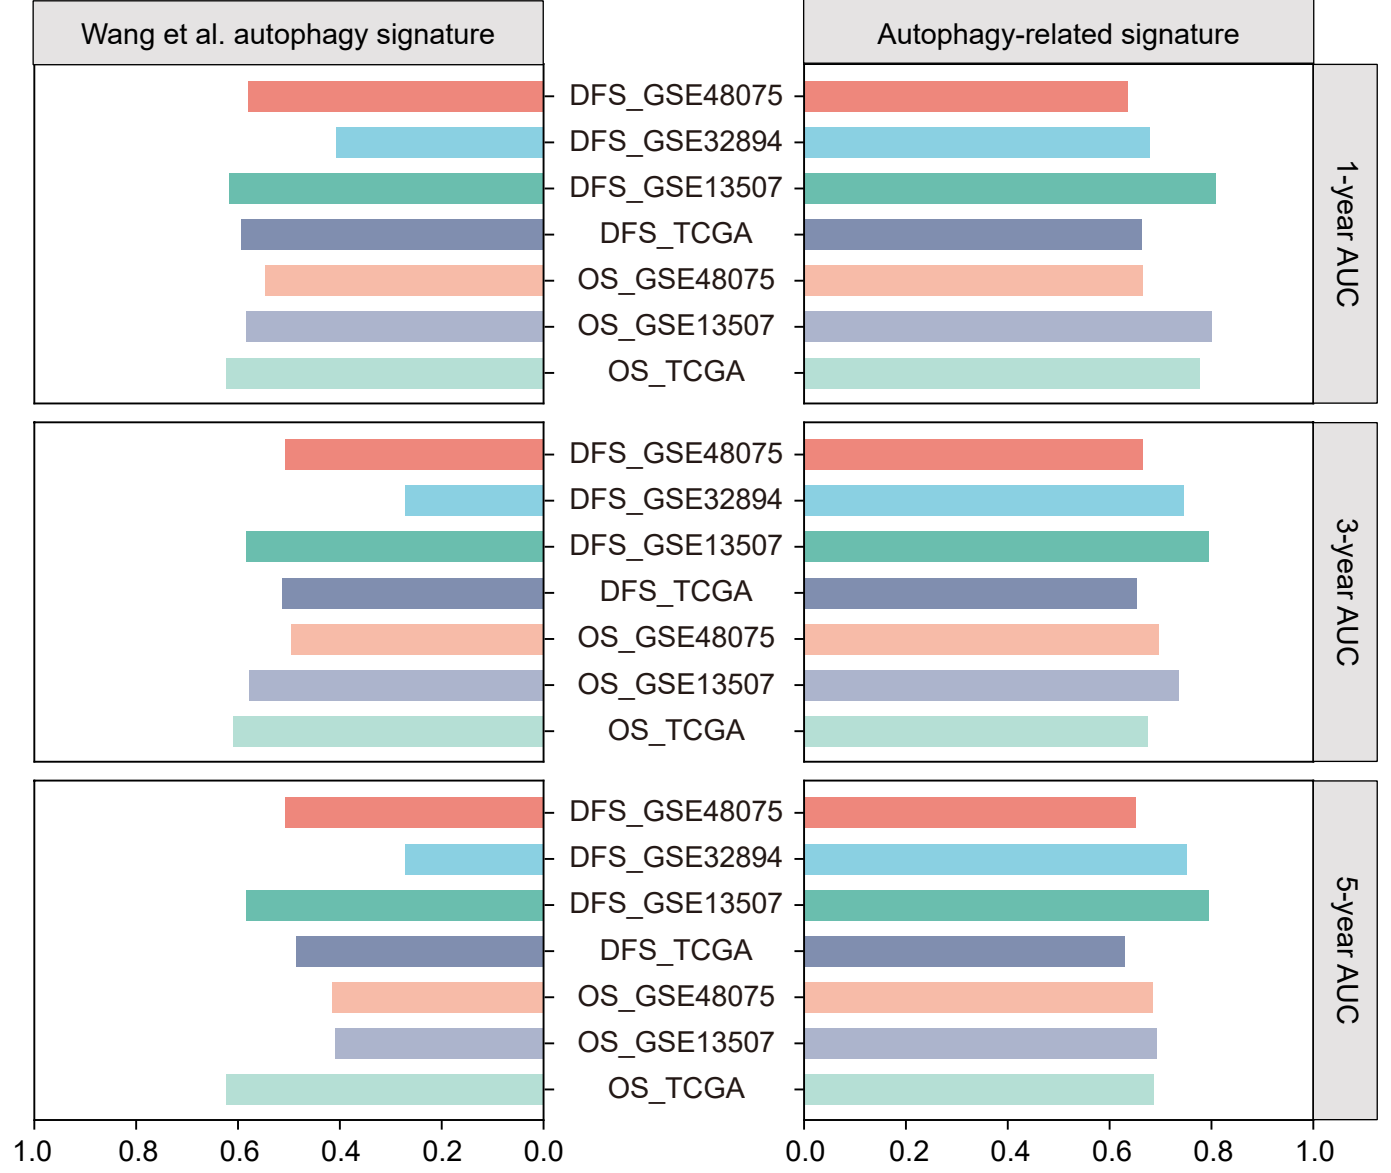

Supplement: JCMM-25-5417-s017.pdf [file JCMM-25-5417-s017.pdf]
